# Supplementary material
Source: PubMed Central journal article supplement (PMC3437573)

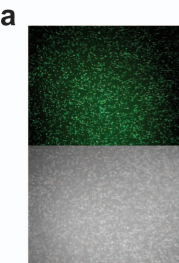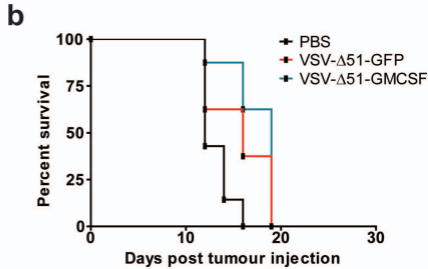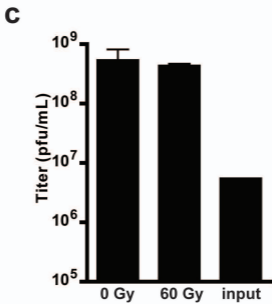

Supplement: mt2012128x1.pdf [file mt2012128x1.pdf]

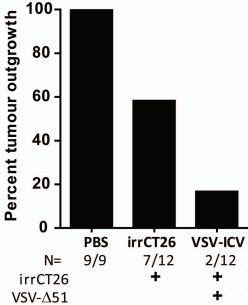

Supplement: mt2012128x2.pdf [file mt2012128x2.pdf]

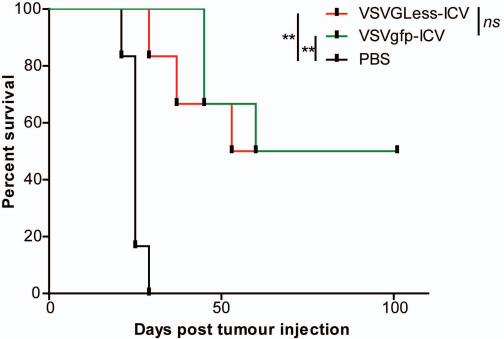

Supplement: mt2012128x3.pdf [file mt2012128x3.pdf]

□ PBS    ▨ irrB16    ▩ VSVgM    ■ VSVgM-ICV

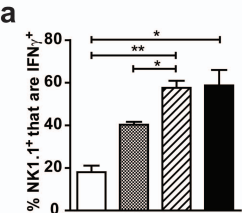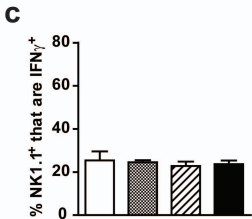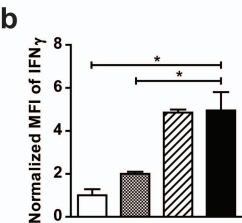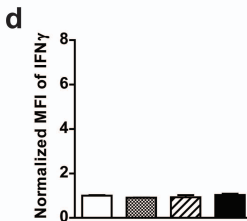

Supplement: mt2012128x4.pdf [file mt2012128x4.pdf]

□ PBS    ▨ irrB16    ▩ VSVgm    ■ VSVgm-ICV

**a**

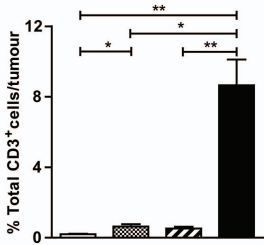

**b**

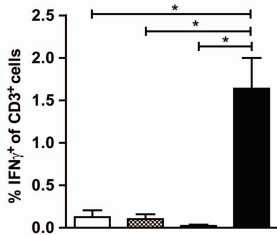

Supplement: mt2012128x5.pdf [file mt2012128x5.pdf]

**a**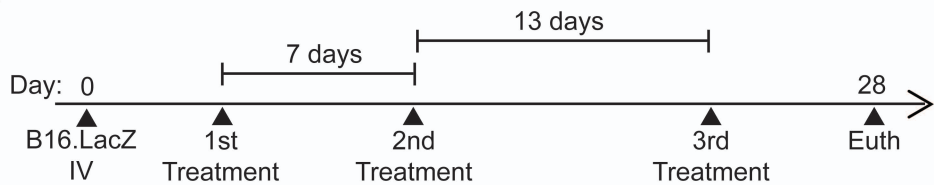**b**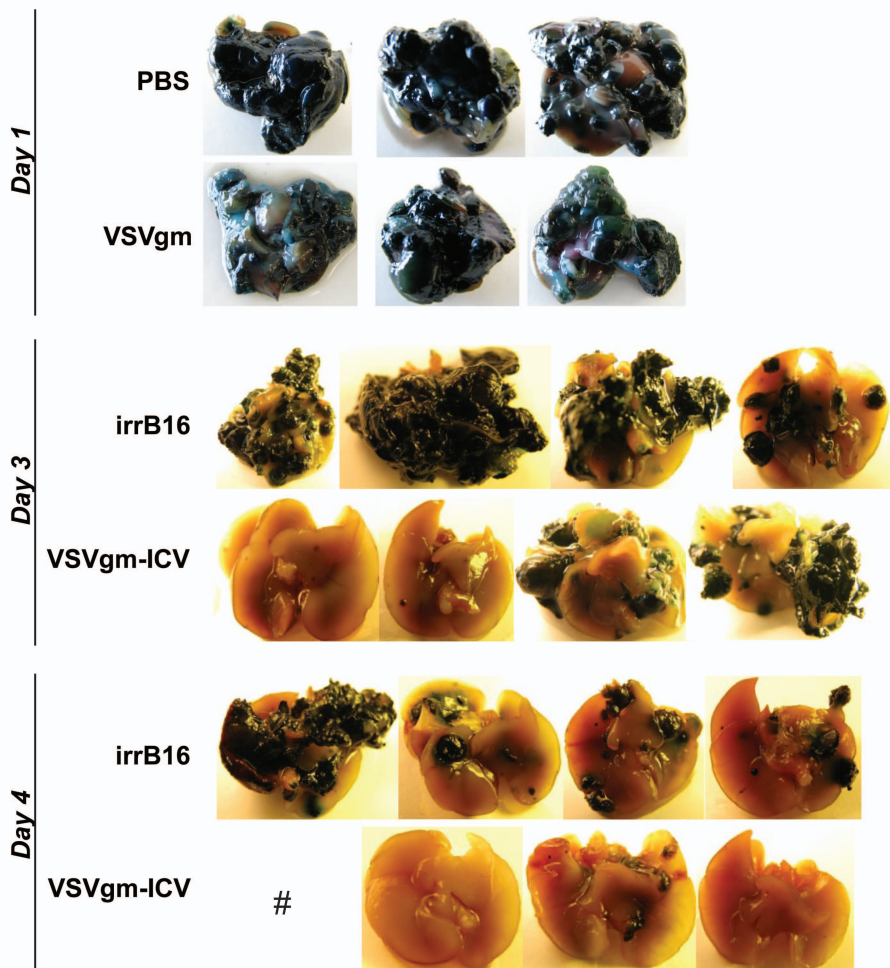

Supplement: mt2012128x6.pdf [file mt2012128x6.pdf]

**a**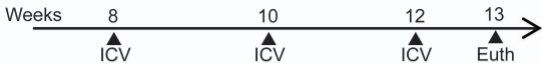**b**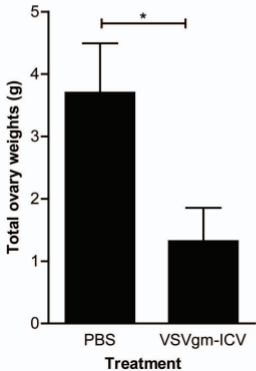

Supplement: mt2012128x7.pdf [file mt2012128x7.pdf]
